# Supplementary material for: Keystone Genes from Extracellular DNA Facilitate Microbial Adaptation in Organochlorine Pesticide-Contaminated Soil
Source: Research Square preprint supplement (doi:10.21203/rs.3.rs-1501748/v1), 2022-03-31
Supplement: Supplementary file 1 [file 7230b894131744a7a1fa3073.docx]

**Fig. S1 Soil sampling points** in a typical organochlorine pesticide (OCP) polluted site in Jiangsu, China. (N' 31.758075, E' 120.228193). **Clean** sample: the total concentrations of OCP pesticides (including hexachlorocyclo-hexane (HCH), chlordane, dichlorodiphenyl trichloroethane (DDT), chloronitrobenzene (NCB) and mirex) were below the detection limits, three **Low** samples: the total concentrations of OCPs were below 100 mg kg-1, and three **High** samples: the total OCPs concentrations were above 100 mg kg-1. The **Clean** samples were used as the background reference.

**Fig. S2 Extraction procedures of soil e-iDNA.**

**Fig. S3 Simpson and Shannon indexes of e-iDNA microbial communities. A.** Simpson indexes. **B.** Shannon indexes.

**Fig. S4 Quadrant chart of different microbial fractions in e-iDNA of OCP-contaminated sites.** The x-axis represents the correlation coefficients of microbial fractions in different OCP-concentrations. The y-axis represents the LOG function of the relative abundance of different microbial fractions, with the base of 10.

**Fig. S5 Distribution of microbial communities in e-iDNA of OCP contaminated sites. A.** Numbers distribution of microbial communities. **B.** Relative abundance distribution of microbial communities.

**Fig. S6 Heatmap of increasing or decreasing folds of different microbial fractions in e-iDNA compared to Clean samples.** The numbers >0.05 or <-0.05 mean that the increasing or decreasing folds have a significant difference between Low or High samples and Clean samples.

**Fig. S7 Shared species among different treatments and between e-iDNA.** The above UpSet-Venn diagrams are shared species among different soils in eDNA and iDNA, respectively. The three Venn diagrams below represent shared species in e-iDNA in clean, low and high soils. (Value *p*<0.05 and *p*<0.01 indicate significant.)

**Fig. S8 Dominant species annotated in eDNA.** The innermost circle is the phylogenetic tree of the selected dominant species. The second circle contains the species names, and the background color is their dominant relative abundance interval. The heatmap in the third circle represents the relative abundance of these species in different soils. Square (Blue) and triangle (Orange) indicate that the relative abundance of these species increases and decreases significantly while stress increases, respectively (*p*<0.05). The purple star indicates shared species annotated by eDNA and iDNA.

**Fig. S9 Percentage of functional genes in e-iDNA in different soil samples. A.** Percentage of functional genes in iDNA fractions. **B.** Percentage of functional genes in eDNA fractions.

**Fig. S10 Heatmap of increasing or decreasing folds of different functional genes in e-iDNA compared to Clean samples.** The numbers >0.05 or <-0.05 mean that the increasing or decreasing folds have a significant difference between Low or High samples and Clean samples.

**Fig. S11 Co-occurrence networks of functional genes annotated in e-iDNA.** Nodes represent different genes and node colors represent different environmental functions. Shared edges between two nodes are interaction types of the two genes, while green indicates mutual exclusion and blue means copresence, respectively. **A.** Co-occurrence networks of functional genes annotated in iDNA fractions. **B.** Co-occurrence networks of functional genes annotated in eDNA fractions.

**Fig. S12 Percentage of shared genes types in e-iDNA in different soil samples.** Type Ⅰ means that the relative abundances of these genes increase while stress increases in e-iDNA, and Type Ⅱ means that the relative abundances of these genes increase in iDNA and decrease in eDNA while stress increases. Type Ⅲ means that the relative abundances of these genes decrease while stress increases in e-iDNA, and Type Ⅳmeans that the relative abundances of these genes decrease in iDNA but increase in eDNA while stress increases.

**Fig. S13 Percentage of four specific genes types in iDNA.** Type Ⅰ means that the relative abundances of these genes increase while stress increases in e-iDNA, and Type Ⅱ means that the relative abundances of these genes increase in iDNA and decrease in eDNA while stress increases. Type Ⅲ means that the relative abundances of these genes decrease while stress increases in e-iDNA, and Type Ⅳmeans that the relative abundances of these genes decrease in iDNA but increase in eDNA while stress increases.

**Fig. S14 Percentage of degradation and metabolic genes in four specific gene types in e-iDNA.** Type Ⅰ, Type Ⅱ, Type Ⅲ and Type Ⅳ have the same meanings as **Fig. S12. A.** Type Ⅰ; **B.** Type Ⅱ; **C.** Type Ⅲ; **D.** Type Ⅳ.

**Fig. S15 Heatmap of Type Ⅰ and Type Ⅲ functional genes in OCP-contaminated soils in e-iDNA.** Type Ⅰ and Type Ⅲ represent the same as **Fig. S12**.

**Fig. S16 Co-occurrence networks of keystone genes across different soil samples.** Nodes represent different genes and node colors represent keystone or non-keystone genes. The sizes of nodes mean the relative abundances of the genes. The determination of keystone genes relies on three indicators- betweenness centrality degree, closeness centrality degree and mean degree. **A.** The co-occurrence network of keystone genes in clean soil sample. **B.** The co-occurrence network of keystone genes in low-contaminated soil samples. **C.** The co-occurrence network of keystone genes in high-contaminated soil samples.

**Fig. S17 Percentage of specific genes types in co-occurrence network of e-iDNA across different soil samples.** Type Ⅰ, Type Ⅱ, Type Ⅲ and Type Ⅳ represent the same as **Fig. S12**.

**Fig. S18 Percentage of specific genes types in keystone gene in e-iDNA across different soil samples.** Type Ⅰ, Type Ⅱ, Type Ⅲ and Type Ⅳ represent the same as **Fig. S12**.

**Fig. S19 Percentage of functional keystone genes in e-iDNA across different soil samples.**

**Fig. S20 Percentage of four specific gene types in e-iDNA keystone genes across different soil samples.** Type Ⅰ, Type Ⅱ, Type Ⅲ and Type Ⅳ represent the same as **Fig. S12**. **A.** Four types of genes in keystone genes of clean soil sample. **B.** Four types of genes in keystone genes of low-contaminated soil samples. **C.** Four types of genes in keystone genes of high-contaminated soil samples. **D.** Percentage of four types of keystone genes of different soil samples.

**Fig. S21 Set-up of the keystone gene plasmids in LB medium with and after OCP stress.** The extraction of plasmids e-iDNA in LB medium was also contained in the workflow.

**Fig. S22 Gene copy numbers of KGs-Clean, KGs-Low and KGs-High in e-iDNA of LB medium with and after different *p*-NCB contaminations.** The verification was conducted via keystone genes plasmids and the plasmids were transduced into *E. coli*. KGs-Clean (Keystone Genes-Clean), KGs-Low and KGs-High have a niche specificity in 0, 10, 100 ppm p-NCB contaminated medium, respectively. In 100→10 ppm and 10→0 ppm mediums, KGs-Clean, KGs-Low and KGs-High in eDNA have a tendency to transfer to iDNA. **A**. KGs-Clean, **B**. KGs-Low, **C**. KGs-High.

**Fig. S23 Gene copy numbers of non-KGs in e-iDNA of LB medium with and after different *p*-NCB contaminations.** The verification set-up and procedure were consistent with **Fig. S21** and **Fig. S22**.

**Fig. S24 Field-based observation in 100 days in ten different OCP-contaminated sites, China. A**. Absolute abundance of the selected nine keystone genes in the 100-day-observation in e-iDNA, Suzhou. The a-axis is the observation time and the y-axis is the LOG function of gene copy numbers of the keystone genes, with the base of 10. **B**. Anhui (Bengbu), **C**. Shandong (Zibo).

**Fig. S25 Field-based observation in 100 days in ten different OCP-contaminated sites, China. A**. Absolute abundance of the selected nine keystone genes in the 100-day-observation in e-iDNA, Jiangxi (Nanchang). **B**. Shanxi (Yuncheng). The illustrations in the figures are same as **Fig. S24**.

**Fig. S26 Field-based observation in 100 days in ten different OCP-contaminated sites, China. A**. Absolute abundance of the selected nine keystone genes in the 100-day-observation in e-iDNA, Chongqing (Shapingba). **B**. Tianjin (Beichen), **C**. Heilongjiang (Suihua). The illustrations in the figures are same as **Fig. S24**.
