# Supplementary material for: Keystone Genes from Extracellular DNA Facilitate Microbial Adaptation in Organochlorine Pesticide-Contaminated Soil
Source: Research Square preprint supplement (doi:10.21203/rs.3.rs-1501748/v1), 2022-03-31
Supplement: Supplementary file 2 [file d7aabf62ff9f5459a295f988.docx]

**Table. S1 The physico-chemical properties of soil samples**

| Sample | NO3-N | NH4-N | pH | OM | TN | TP | AN | AP | OP | CEC | AS |
| --- | --- | --- | --- | --- | --- | --- | --- | --- | --- | --- | --- |
| Clean | 90.94 | 20.66 | 7.44 | 46.84 | 2.73 | 1.05 | 183.75 | 47.38 | 0.26 | 20.00 | 27.58 |
| Low-1 | 16.90 | 9.58 | 8.53 | 11.08 | 0.75 | 0.46 | 51.45 | 11.76 | 0.17 | 16.92 | 11.26 |
| Low-2 | 81.99 | 19.15 | 7.66 | 51.63 | 3.06 | 3.21 | 165.38 | 392.03 | 0.21 | 22.69 | 34.29 |
| Low-3 | 7.87 | 13.88 | 8.33 | 11.78 | 0.67 | 0.55 | 36.75 | 21.34 | 0.10 | 18.71 | 13.78 |
| High-1 | 11.15 | 7.90 | 8.35 | 5.00 | 0.38 | 0.50 | 25.73 | 8.47 | 0.06 | 18.21 | 11.67 |
| High-2 | 17.69 | 10.01 | 8.42 | 8.73 | 0.59 | 0.65 | 29.40 | 25.23 | 0.08 | 15.52 | 115.00 |
| High-3 | 17.56 | 10.42 | 8.27 | 17.80 | 0.93 | 1.85 | 47.78 | 199.27 | 0.07 | 18.51 | 33.12 |

Note: OM: organic matter; TN: total nitrogen; TP: total phosphorus; AN: available nitrogen; AP: available phosphorus; OP: organic phosphorus; CEC: cation exchange capacity; AS: available sulfur; OM, TN, TP, OP: mg kg-1; NO3-N, NH4-N, AN, AP, AS: mg kg-1; CEC: cmol kg-1

**Table S2 The concentrations of OCPs in soil samples**

| Sample | α-HCH | β-HCH | γ-HCH | *p,p*'-DDE | *p,p*'-DDD | *o,p*'-DDT | *p,p*'-DDT | *o*-NCB | *p*-NCB |
| --- | --- | --- | --- | --- | --- | --- | --- | --- | --- |
| Clean | — | — | — | — | — | — | — | — | — |
| Low-1 | — | — | 14.10 | — | — | — | — | 1.25 | — |
| Low-2 | — | — | 47.00 | 28.00 | — | — | — | — | — |
| Low-3 | — | — | — | 26.40 | — | 20.00 | — | — | — |
| High-1 | — | 25.00 | 48.00 | 38.00 | 27.00 | — | — | 2.49 | 4.85 |
| High-2 | 50.00 | 32.00 | 14.00 | 55.00 | — | 51.00 | 120.00 | 3.17 | 14.23 |
| High-3 | — | 27.00 | 48.00 | 37.00 | 27.00 | — | 47.00 | 2.73 | 4.85 |

Note: α-HCH: α-Hexachlorocyclohexane; β-HCH: β- Hexachlorocyclohexane; γ-HCH: γ-Hexachlorocyclohexane; *p,p*’-DDE: 1,1-dichloro-2,2-bis(4-chorophenyl)ethylene; *p,p*'-DDD: 1,1-dichloro-2,2-bis(p-chlorlphenylethane); *o,p*'-DDT: 1,1,1-Trichloro-2-(2-chlorophenyl)-2-(4-chlorophenyl)ethane, *p,p*'-DDT: Benzene-13C6,1,1'-(2,2,2-trichloroethylidene)bis[4-chloro- (9CI); *o*-NCB: o-Nitrochlorobenzene; *p*-NCB: p-Nitrochlorobenzene; mg kg-1

**Table S3** **Sequencing data of e-iDNA of soil samples**

| Sample | DNA | Reads number | Bases numbers | N (%) | GC (%) | Q20 (%) | Q30 (%) |
| --- | --- | --- | --- | --- | --- | --- | --- |
| Clean | eDNA | 115836970 | 17491382470 | 0.00155 | 70.15 | 95.01 | 89.96 |
| iDNA | 53377592 | 8060016392 | 0.00154 | 64.08 | 97.56 | 94.20 |
| Low-1 | eDNA | 129183252 | 19506671052 | 0.00155 | 66.89 | 96.22 | 92.07 |
| iDNA | 109690618 | 16563283318 | 0.00390 | 62.06 | 96.63 | 92.23 |
| Low-2 | eDNA | 143984614 | 21741676714 | 0.00155 | 66.49 | 96.20 | 92.22 |
| iDNA | 185639170 | 27845875500 | 0.00163 | 63.34 | 97.25 | 92.52 |
| Low-3 | eDNA | 101474142 | 15322595442 | 0.00155 | 69.81 | 95.00 | 90.03 |
| iDNA | 215765780 | 32364867000 | 0.00162 | 62.86 | 97.37 | 92.88 |
| High-1 | eDNA | 142129220 | 21461512220 | 0.00154 | 66.37 | 96.86 | 93.05 |
| iDNA | 145430596 | 21960019996 | 0.00390 | 63.80 | 96.48 | 91.86 |
| High-2 | eDNA | 98387270 | 14856477770 | 0.00154 | 68.06 | 95.49 | 91.20 |
| iDNA | 185167668 | 27775150200 | 0.00159 | 63.33 | 97.45 | 92.98 |
| High-3 | eDNA | 104377770 | 15761043270 | 0.00155 | 67.06 | 96.58 | 92.62 |
| iDNA | 198668600 | 29800290000 | 0.00163 | 63.58 | 96.98 | 91.98 |

Note: N (%) is the ratio of ambiguous bases to the total number of bases; GC (%) is the GC content; Q20 (%) and Q30 (%) are the proportion of bases whose determination accuracy is over 99% and 99.9%, respectively to the total bases.

**Table S4** **Standard contigs of keystone and non-keystone genes**

| KO number | gene name | Standard Contigs number | environmental function |
| --- | --- | --- | --- |
| K01997 | *livH* | >NC_000913.3:c3596403-3595477 | map02010 ABC transporters |
| K11209 | *yfcG* | >NC_000913.3:2420621-2421268 | GSH-dependent disulfide-bond oxidoreductase |
| K00799 | *gst* | >NC_002695.2:2314241-2314846 | map01100 Metabolic pathways |
| K03497 | *parB* | >NC_000964.3:c4206404-4205556 | chromosome partitioning protein |
| K04091 | *ssuD* | >NC_000913.3:c995988-994843 | map00920 Sulfur metabolism |
| K02274 | *coxA* | >NC_002516.2:128512-130104 | map00190 Oxidative phosphorylation |
| K01961 | *accC* | >NC_000913.3:3405917-3407266 | map01200 Carbon metabolism |
| K00333 | *nuoD* | >NC_002945.4:3472859-3474181 | map00190 Oxidative phosphorylation |
| K00632 | *fadA* | >NC_000913.3:c4028772-4027609 | map00362 Benzoate degradation |
| K12132 | *prkC* | >NC_000964.3:1651142-1653088 | Transferases |
| K02355 | *fusA* | >NC_000913.3:c3473514-3471400 | Mitochondrial DNA transcription, translation, and replication factors |
| K01999 | *livK* | >NC_000913.3:c3597560-3596451 | map02010 ABC transporters |
| K03701 | *uvrA* | >NC_000913.3:c4273871-4271049 | map03420 Nucleotide excision repair |
| K01953 | *asnB* | >NC_000913.3:c699177-697513 | map01100 Metabolic pathways |
| K07114 | *yfbK* | >NC_000913.3:c2385722-2383995 | Transferases |
| K02337 | *dnaE* | >NC_000913.3:205126-208608 | map03030 DNA replication |
| K03798 | *ftsH* | >NC_000913.3:c3326935-3325001 | Hydrolases |
| K03168 | *topA* | >NC_000913.3:1331048-1333645 | DNA repair and recombination proteins |

**Table S5** **The primers of keystone and non-keystone genes**

| KO number | gene name | forward primer（5’-3’） | reverse primer（5’-3’） |
| --- | --- | --- | --- |
| K01997 | *livH* | TTATATGATTGGCAGCTACGTCTCA | TAGTTTTGCAGGAAGATGGACATAC |
| K11209 | *yfcG* | ATGGTCACAAAATTACGCTGTTTCT | TGTTTTCTCAGCCAGATACAACAAA |
| K00799 | *gst* | GCTCGTCAGTGTGGATTTAATGAAA | CATTCGATGGTTTTATAGCGGGAAA |
| K03497 | *parB* | TATCAGAGGCGTTAATGAGGGAAAT | GCAGTGTCAGCAGTCTTAAATGATT |
| K04091 | *ssuD* | GTTTATTGCAGAGAGAAACCGTCG | CGATTTTCTCTTTAACCAGTTCCGG |
| K02274 | *coxA* | TTACTACTGGCTGCCGAAGTG | GATGCACTTGATGACGATGAACAG |
| K01961 | *accC* | TGGTTTACATGGAGAAATACCTGGA | ATAGCCGATATCAACACACGCTTTA |
| K00333 | *nuoD* | AAAGAGATGTGGGAGTCGATGAAG | CAGTTTGAAGTGGTGGATCAGC |
| K00632 | *fadA* | CATGAATTAGGTCTTAAGCCGCG | AGTCCCAGATCTTTAATACATGGCA |
| K12132 | *prkC* | CAGTGAAAGAAAAGGTCAAGATCCC | CCTGGTTCAATCTTTAGTTCGATCG |
| K02355 | *fusA* | CAGGCAAACAAATATAAAGTTCCGC | TAGCTTTCATTTTCACCAGGTCAAC |
| K01999 | *livK* | TGGTCATCTGTGTTCTTCTTCTACC | CCATACTGTTGTTTGTCGTGAATGA |
| K03701 | *uvrA* | CCAAGTTTATCAGTAATCGTCCGTG | TGCGAGTTTGAGATTGTTGAAGAAT |
| K01953 | *asnB* | TCCTCAATTATTTCCGCTATCACCA | CCTGTACAGTGAAGTGAATTTCGTG |
| K07114 | *yfbK* | GCATCAATCGCATTTTATTAGCCAC | TCTGCCGCATTTCACTATTCAATAC |
| K02337 | *dnaE* | CGGACACCCTATCAACCAGTATTTA | TATTTATCCAGGGCGTCAGTAAACA |
| K03798 | *ftsH* | GGATATTCTGCATGCGATGAAAGAT | CTACCATTGTCGCCAGAATTGTTAG |
| K03168 | *topA* | CCTTTTATTACCTCTACGCTGCAAC | GCTGATATAACCGCGAACCATATTT |

**Table. S6 The physico-chemical properties of soil samples in field-based observation**

| Sample | NO3-N | NH4-N | pH | OM | TN | TP | AN | AP | OP | CEC | AS |
| --- | --- | --- | --- | --- | --- | --- | --- | --- | --- | --- | --- |
| S1 | 135.92 | 20.02 | 7.56 | 61.02 | 3.32 | 3.39 | 194.78 | 538.92 | 0.30 | 23.38 | 45.94 |
| S2 | 63.19 | 16.58 | 7.87 | 52.57 | 2.99 | 3.21 | 187.43 | 373.62 | 0.23 | 22.59 | 37.86 |
| S3 | 16.30 | 9.27 | 8.34 | 7.70 | 0.58 | 0.45 | 36.75 | 14.85 | 0.30 | 18.41 | 13.14 |
| S4 | 19.73 | 11.64 | 8.25 | 10.97 | 0.65 | 0.94 | 40.43 | 53.50 | 0.17 | 12.14 | 4.09 |
| S5 | 4.40 | 8.60 | 8.27 | 9.11 | 0.47 | 1.01 | 29.40 | 60.43 | 0.17 | 11.34 | 5.71 |
| S6 | 16.86 | 8.26 | 8.36 | 2.85 | 0.30 | 0.49 | 25.73 | 9.60 | 0.06 | 14.13 | 35.71 |
| S7 | 15.79 | 10.13 | 8.42 | 11.58 | 0.67 | 0.59 | 51.45 | 32.66 | 0.10 | 19.20 | 25.77 |
| S8 | 61.35 | 12.77 | 7.89 | 38.85 | 2.19 | 2.57 | 132.30 | 343.62 | 0.22 | 21.99 | 27.81 |
| S9 | 81.17 | 15.34 | 7.88 | 46.38 | 2.73 | 2.51 | 154.35 | 306.61 | 0.43 | 21.39 | 33.35 |
| S10 | 69.47 | 13.39 | 7.9 | 49.01 | 2.70 | 2.92 | 158.03 | 384.41 | 0.27 | 22.29 | 29.87 |

Note: OM: organic matter; TN: total nitrogen; TP: total phosphorus; AN: available nitrogen; AP: available phosphorus; OP: organic phosphorus; CEC: cation exchange capacity; AS: available sulfur; OM, TN, TP, OP: mg kg-1; NO3-N, NH4-N, AN, AP, AS: mg kg-1; CEC: cmol kg-1

**Table S7 The concentrations of OCPs in soil samples in field-based observation**

| Sample | ClB | *o*-DCB | *m*-DCB | *p*-DCB | *o*-NCB | *p*-NCB | *m*-NCB | HCH | DDT |
| --- | --- | --- | --- | --- | --- | --- | --- | --- | --- |
| S1 | 0 | 0 | 0 | 0 | 0 | 0 | 0 | 0 | 0 |
| S2 | 0 | 0 | 0 | 0 | 0 | 2.926 | 0 | 0 | 0 |
| S3 | 186 | 0 | 0 | 0 | 0 | 4.725 | 0 | 0 | 0 |
| S4 | 113 | 0 | 0 | 0 | 2.945 | 69.527 | 1.737 | 0 | 0 |
| S5 | 2940 | 0 | 0 | 0.216 | 206 | 163 | 6.303 | 0 | 0 |
| S6 | 396 | 0.889 | 0.934 | 0.518 | 1570 | 4680 | 7.704 | 0 | 0 |
| S7 | 870 | 0 | 0.557 | 0 | 0 | 1.019 | 1.512 | 118 | 103 |
| S8 | 55 | 0 | 0 | 0 | 0 | 61.12 | 0 | 123 | 75 |
| S9 | 113 | 0 | 0 | 0 | 0 | 0 | 2.57 | 30.81 | 112 |
| S10 | 0 | 0 | 0 | 0 | 0 | 0 | 0 | 222 | 28 |

Note: 1) ClB: Chlorobenzene; *o*-DCB: o-Dichlorobenzene; *m*-DCB: *m*-Dichlorobenzene; *p*-DCB: *p*-Dichlorobenzene; *o*-NCB: *o*-Nitrochlorobenzene; *p*-NCB: *p*-Nitrochlorobenzene; *m*-NCB: *m*-Nitrochlorobenzene; mg kg-1

2) S1: Jiangsu (Nanjing); S2: Jiangsu (Suzhou); S3: Anhui (Bengbu); S4: Zhejiang (Hangzhou); S5: Jiangxi (Nanchang); S6: Chongqing (Shapingba); S7: Shandong (Zibo); S8: Shanxi (Yuncheng); S9: Tianjin (Beichen); S10: Heilongjiang (Suihua)
